# Supplementary material for: Effects of Saccharomyces cerevisiae hydrolysate on growth performance, immunity function, and intestinal health in broilers
Source: PubMed Central journal article supplement — Poult Sci. 2022 Oct 10;102(1):102237. doi: 10.1016/j.psj.2022.102237 (PMC9640315; doi:10.1016/j.psj.2022.102237), 2022-10-10
Supplement: mmc1.pdf [file mmc1.pdf]

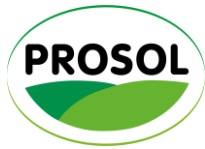

## MATERIAL SAFETY DATA SHEET

### I-CARE (HYK)

#### 1. IDENTIFICATION OF THE SUBSTANCE/PREPARATION AND OF THE COMPANY

- |                            |                                                                                                                                                                                                                |
|----------------------------|----------------------------------------------------------------------------------------------------------------------------------------------------------------------------------------------------------------|
| 1. Commercial product name | <i>I-Care</i>                                                                                                                                                                                                  |
| 2. Description             | Hydrolized Yeast - Feed.Material                                                                                                                                                                               |
| 3. Manufacturer/Supplier   | Prosol SpA<br>Via Carso, 99<br>24040 Madone ( BG) Italy<br>Tel. +39 035 991665, Fax +39 035 992246<br>e-mail: <a href="mailto:mailto:prosol@prosol-spa.it">mailto:prosol@prosol-spa.it</a><br>118 (Italy only) |
| 4. Emergency phone number  |                                                                                                                                                                                                                |

#### 2. HAZARDS IDENTIFICATION

- |                           |                                                                |
|---------------------------|----------------------------------------------------------------|
| 1. Product classification | Available data don't suggest any hazard for health and safety. |
| 2. Label picture          | None.                                                          |
| 3. Others hazards         | None.                                                          |

#### 3. COMPOSITION/INFORMATION ON INGREDIENT

- |                |                 |
|----------------|-----------------|
| 1. Composition | Inactive yeast. |
| 2. N° CAS      | Not applicable. |

#### 4. FIRST AID MEASURES

- |                        |                                                                                   |
|------------------------|-----------------------------------------------------------------------------------|
| 1. First aid measures  |                                                                                   |
| Inhalation             | Remove from exposure. If irritation or allergic response occur, consult a doctor. |
| Eye contact            | Flush eyes with water. Should irritation occur, seek medical advice.              |
| Skin contact           | Wash off with plenty of water.                                                    |
| Ingestion              | Rinse mouth and throat thoroughly with water and seek medical advice.             |
| 2. Symptoms and effect | None.                                                                             |
| 3. Special treatments  | None.                                                                             |

#### 5. FIRE-FIGHTING MEASURES

- |                                          |                             |
|------------------------------------------|-----------------------------|
| 1. Suitable fire extinguishing media     | Product is not inflammable. |
| 2. Special exposure hazards              | None.                       |
| 3. Protection against fire and explosion | None.                       |

#### 6. ACCIDENTAL RELEASE MEASURES

- |                                  |                                                                                   |
|----------------------------------|-----------------------------------------------------------------------------------|
| 1. Personal sanitary precautions | Avoid raising dust from dried preparation and provide for sufficient ventilation. |
| 2. Environment precautions       | None.                                                                             |
| 3. Reclamation method            | Take up by mechanical means or by vacuum equipped with filter.                    |

#### 7. HANDLING AND STORAGE

- |                         |                                                                       |
|-------------------------|-----------------------------------------------------------------------|
| 1. Handling precautions | Provide good ventilation of the room, when handling this preparation. |
| 2. Storage              | Store container in a dry and cool place.                              |

#### 8. EXPOSURE CONTROL/PERSONAL PROTECTION

- |                        |       |
|------------------------|-------|
| 1. Control's parameter | None. |
|------------------------|-------|

#### PROSOL S.P.A.

Via Carso, 99 - 24040 Madone (BG) Italy  
Tel +39 035.99.16.65 - Fax +39 035.99.22.46  
[www.prosol-spa.it](http://www.prosol-spa.it) - [prosol@prosol-spa.it](mailto:prosol@prosol-spa.it)

Reg. Impr. BG - C.F. e Partita IVA IT00391410164  
Capitale Sociale €600.00,00 i.v.



## MATERIAL SAFETY DATA SHEET

### I-CARE (HYK)

- |                                  |                                                        |
|----------------------------------|--------------------------------------------------------|
| 2. Personal protective equipment |                                                        |
| Hand protection                  | Rubber gloves                                          |
| Eye protection                   | Protecting glasses                                     |
| Respiratory protection           | Mask for powder in case of contact with the substance. |

### 9. PHYSICAL AND CHEMICAL PROPERTIES

- |               |                     |
|---------------|---------------------|
| 1. Appearance | Light brown powder. |
| 2. Odor       | Typical.            |
| 3. Solubility | Insoluble.          |

### 10. STABILITY AND REACTIVITY

- |                                                 |                                                          |
|-------------------------------------------------|----------------------------------------------------------|
| 1. Reactivity, stability and dangerous reaction | The preparation is stable under normal condition of use. |
| 2. Conditions to avoid                          | None.                                                    |
| 3. Material to avoid                            | None.                                                    |
| 4. Hazardous decomposition products             | None.                                                    |

### 11. TOXICOLOGICAL INFORMATION

Product is considered as atoxic

### 12. ECOLOGICAL INFORMATION

- |                                  |               |
|----------------------------------|---------------|
| 1. Toxicity                      | Not dangerous |
| 2. Persistency and degradability | Not dangerous |
| 3. Bioaccumulative potential     | Not dangerous |
| 4. Mobility                      | Not dangerous |
| 5. PBT e vPvB                    | Not dangerous |

### 13. DISPOSAL CONSIDERATION

No special disposal method required, except to be in accordance with current local authority regulations.

### 14. TRANSPORT INFORMATION

- |                                          |                 |
|------------------------------------------|-----------------|
| 1. N°UN                                  | Not applicable. |
| 2. Transport classification of dangerous | None.           |
| 3. Environmental hazards                 | None.           |
| 4. Special precaution                    | None.           |

### 15. REGULATORY INFORMATION

- |                 |                                       |
|-----------------|---------------------------------------|
| 1. Special rule | Not particular indication is required |
|-----------------|---------------------------------------|

### 16. OTHER INFORMATION

The information contained in this Material Safety Data Sheet, as of the issue date, is believed to be true and correct.

However, the accuracy or completeness of this information and any recommendations or suggestions are made without warranty or guarantee.

Since the conditions of use are beyond the control of our company, it is the responsibility of the user to determine the conditions of safe use of this preparation. The information in this sheet does not represent analytical specifications, for which please refer to our technical data sheet.

Any and all contents of this document, including, texts, images, trademarks, logos, graphic, their disposition and adaptation (the "Contents"), if not otherwise indicated, are exclusive property of Prosol S.p.A. and are protected by copyright.

It is prohibited to copy, modify, distribute, publish or use in any way on websites and/or commercial documents / brochures / information materials or otherwise such Contents without the prior written consent of Prosol S.p.A..

Date: February 2020

#### PROSOL S.P.A.

Via Carso, 99 - 24040 Madone (BG) Italy  
Tel +39 035.99.16.65 - Fax +39 035.99.22.46  
[www.prosol-spa.it](http://www.prosol-spa.it) - [prosol@prosol-spa.it](mailto:prosol@prosol-spa.it)

Reg. Impr. BG - C.F. e Partita IVA IT00391410164  
Capitale Sociale €600.00,00 i.v.

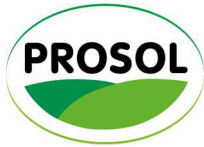

## Certificate of Analysis nr 939/22

Product name: I – CARE Saccharomyces

Batch: 210210

Production date: February 2021

| Test       | Unit  | Result    | Method    |
|------------|-------|-----------|-----------|
| Appearance | -     | Powder    | Sensorial |
| Colour     | -     | Light tan | Sensorial |
| Odour      | -     | Typical   | Sensorial |
| Moisture   | %     | 2,4       | MAPROS03  |
| Proteins   | %     | 38,1      | MAPROS01  |
| Salmonella | / 25g | Absent    | MAPROS46  |

Prosol S.p.A.  
Quality Control Manager  
Caivano Roberta

Date: 23/08/2022

This document is automatically issued and doesn't need signature.

### PROSOL S.P.A.

Via Carso, 99 - 24040 Madone (BG) Italy  
Tel +39 035.99.16.65 - Fax +39 035.99.22.46  
[www.prosol-spa.it](http://www.prosol-spa.it) - [prosol@prosol-spa.it](mailto:prosol@prosol-spa.it)

Reg. Impr. BG - C.F. e Partita IVA IT00391410164  
Capitale Sociale €600.000,00 i.v.
